# Supplementary material for: Postbiotics from Pichia kudriavzevii promote intestinal health performance through regulation of Limosilactobacillus reuteri in weaned piglets
Source: Royal Society of Chemistry journal article supplement (doi:10.1039/d2fo03695a), 2023-01-01
Supplement: d2fo03695a1.pdf [file d2fo03695a1.pdf]

1 **Supplementary Material**

2

3 **Postbiotics from *Pichia kudriavzevii* promote intestinal health performance**

4 **through regulation of *Limosilactobacillus reuteri* in weaned piglets**

5

6 Zhenting Zhang<sup>1,2</sup>, Qiujin Guo<sup>1</sup>, Jing Wang<sup>1</sup>, Hongyan Tan<sup>1</sup>, Xuexia Jin<sup>1</sup>, Yurong Fan<sup>1</sup>,

7 Jiali Liu<sup>1</sup>, Shumiao Zhao<sup>1</sup>, Jinshui Zheng<sup>3</sup>, Nan Peng<sup>1</sup> \*

8

9 <sup>1</sup> State Key Laboratory of Agricultural Microbiology, Hubei Hongshan Laboratory,

10 College of Life Science and Technology, Huazhong Agricultural University, Wuhan,

11 430070, Hubei, P.R. China

12 <sup>2</sup> The Key Laboratory of Environmental Pollution Monitoring and Disease Control,

13 Ministry of Education, School of Public Health, Guizhou Medical University, Guiyang

14 550025, Guizhou, P.R. China.

15 <sup>3</sup> State Key Laboratory of Agricultural Microbiology, College of Informatics,

16 Huazhong Agricultural University, Wuhan, 430070, Hubei, P.R. China

17 \*Correspondence should be addressed to Nan Peng: Tel: +86 27 8728 1267, Fax: +86

18 27 8728 0670, Email: [nanp@mail.hzau.edu.cn](mailto:nanp@mail.hzau.edu.cn)

19 **Figures**

20

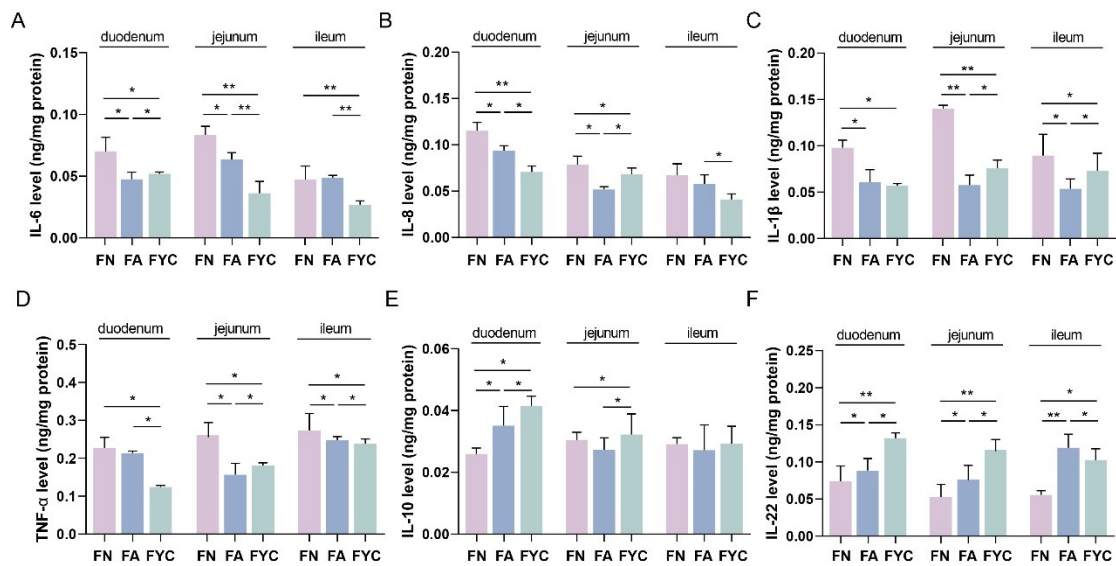

21

22 **Supplementary Figure 1. Supplementation of *P. kudriavzevii* postbiotics reduced**

23 **intestinal inflammation in early-weaned piglets.** The concentration of intestinal pro-

24 inflammatory factors (A-D) and anti-inflammatory factors (E and F) in the duodenum,

25 jejunum, and ileum of the piglets from the groups of early-weaned piglets fed on a

26 normal diet (FN), a normal diet with antibiotics (FA), or a normal diet with 0.5% yeast

27 culture (FYC). Data are shown as mean  $\pm$  SD. Statistical analyses were performed using

28 one-way ANOVA. Significance, \*\*  $p < 0.01$ , \*  $p < 0.05$ .

29

30

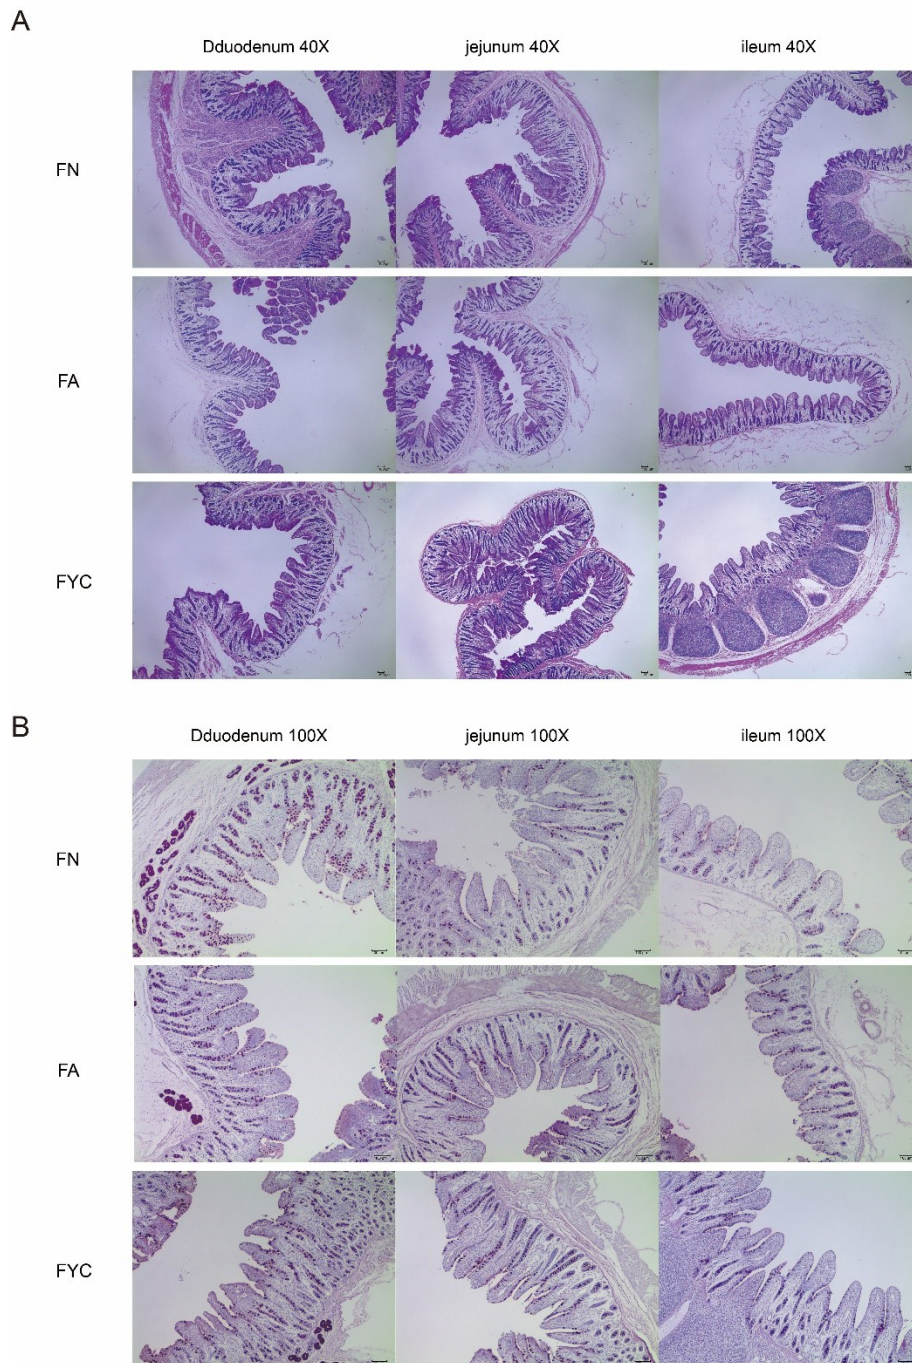

31

32 **Supplementary Figure 2. The effects of yeast postbiotics supplementation on**

33 **duodenum, jejunum, and ileum histological morphology. (A) HE staining; (B) PAS**

34 **staining. Normal diet (FN), a normal diet with antibiotics (FA), or a normal diet with**

35 **0.5% yeast culture (FYC). The images of the intestinal morphology at 40 × (HE) and**

36 **100 × (PAS) magnification (scale bars, 100 μm) are shown.**

37

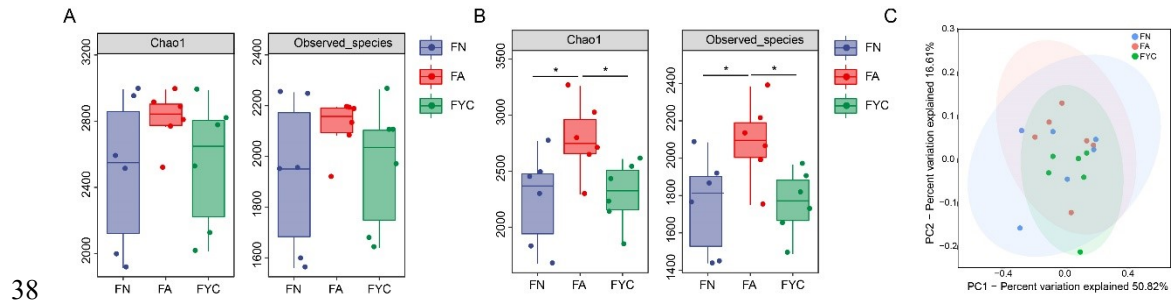

38

39 **Supplementary Figure 3. The alpha and beta diversities of the intestinal bacterial**  
 40 **communities. (A)** Bacterial alpha diversity based on Chao 1 and observed species  
 41 index (from 0 to 3 days) or **(B)** from 6 to 12 days. **(C)** Scatterplot from PCoA in  
 42 bacterial communities based on the weighted UniFrac distance (from 0 to 3 days). One-  
 43 way ANOVA with adjustment for multiple comparisons was conducted. Significance,  
 44  $*p < 0.05$ .

45

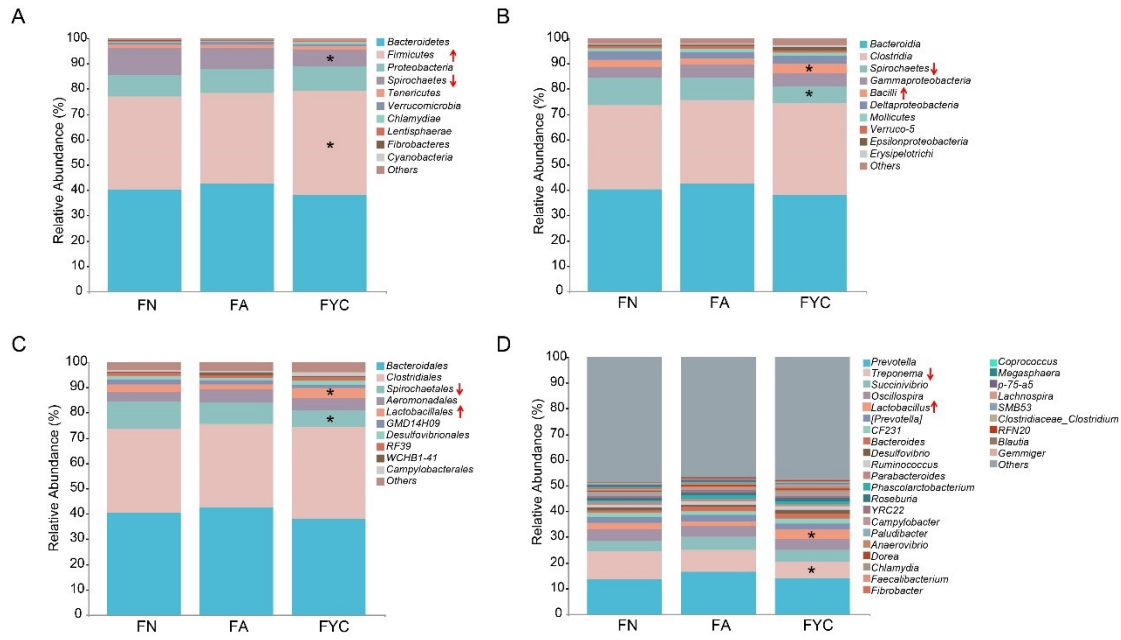

46

47 **Supplementary Figure 4. Supplement of yeast postbiotics affected the intestinal**

48 **bacterial taxonomic compositions.** The shifts in the relative abundance of bacterial

49 phylum (A), class (B), order (C), and genus (D). One-way ANOVA with adjustment

50 for multiple comparisons was conducted. FN, FA, and FYC: groups of early-weaned

51 piglets fed on a normal diet (FN), a normal diet with antibiotics (FA), and a normal diet

52 with 0.5% yeast culture (FYC). Statistical analyses were performed using one-way

53 ANOVA. Significance, \*  $p < 0.05$ .

54

55

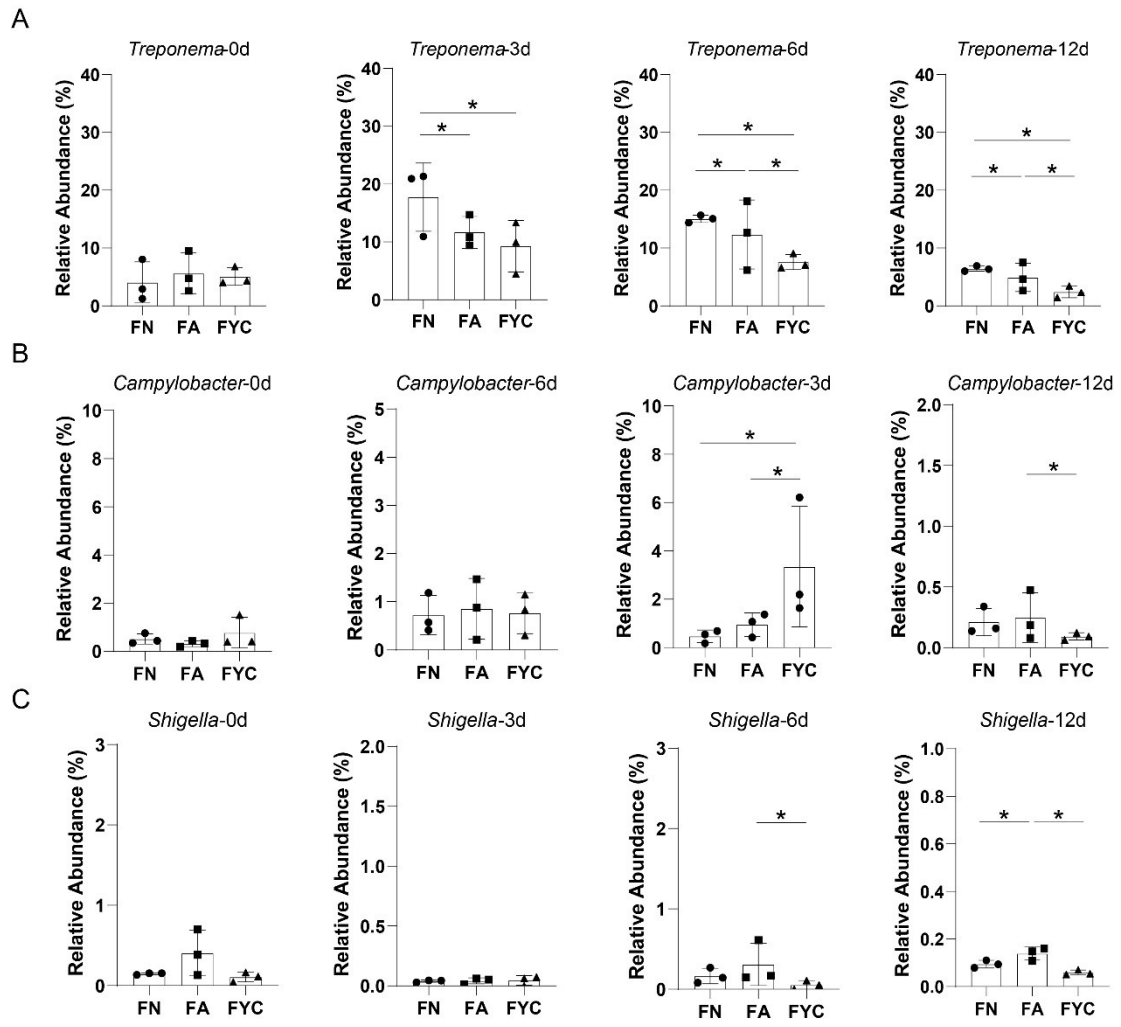

56

57 **Supplementary Figure 5. The relative abundances of pathogenic bacteria,**  
 58 **including *Treponema* (A), *Campylobacter* (B), and *shigella* (C), in different groups**  
 59 **at four time points. FN, FA, and FYC: groups of early-weaned piglets fed on a normal**  
 60 **diet (FN), a normal diet with antibiotics (FA), and a normal diet with 0.5% yeast culture**  
 61 **(FYC). Statistical analyses were performed using one-way ANOVA. Significance, \*  $p$**   
 62 **< 0.05.**

63

64

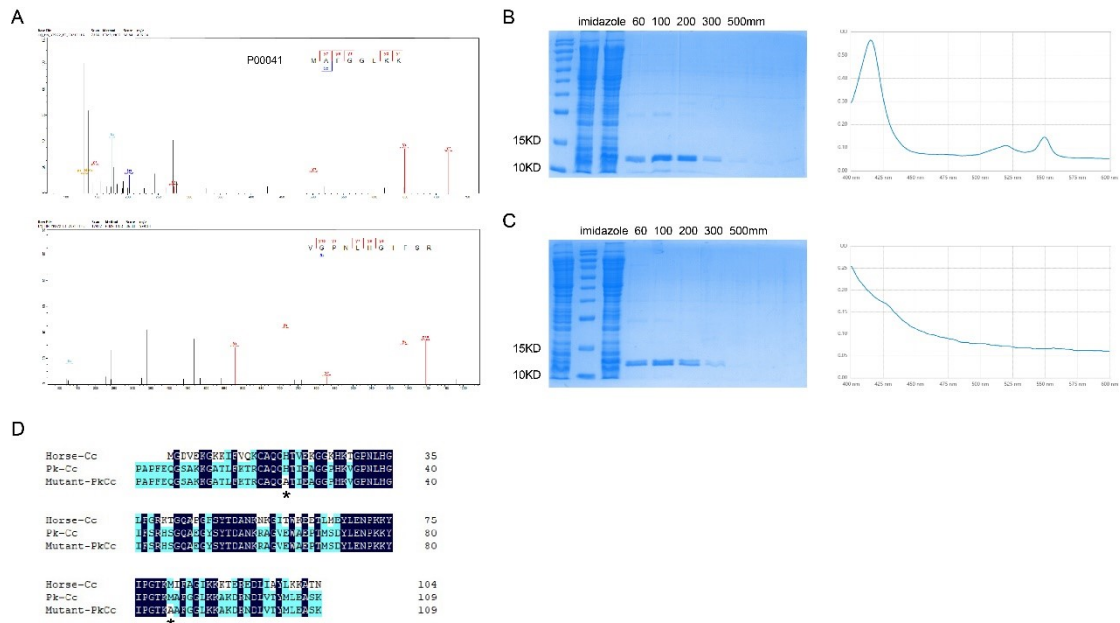

65

66 **Supplementary Figure 6. Identification of the proteins from *P. kudriavzevii***

67 **postbiotics.** (A) Characteristics of the peptides of cytochrome c. Red represents the

68 peptides of cytochrome c. (B) SDS-PAGE analysis of heterogeneously expressed wild-

69 type and detection of the characteristic absorption peak of cytochrome c. M, protein

70 markers. (C) SDS-PAGE analysis of heterogeneously expressed mutant and detection

71 of the characteristic absorption peak of cytochrome c. M, protein markers. (D)

72 Sequence alignment of different cytochrome c. Horse-Cc was from the heart of a horse.

73 Pk-Cc was expressed from *E. coli*. Mutant-Cc was expressed in *E. coli* with haem iron

74 ligands changed, \* represent mutant sites. Statistical analyses were performed using

75 one-way ANOVA. Significance, \*\*\*  $p < 0.001$ , \*\*  $p < 0.01$ , \*  $p < 0.05$ .

76



77 **Tables**78 **Table S1 CDM-medium composition (final pH 7).**

|                              | <b>Component</b>                                                                   | <b>Concentration,<br/>g/L</b>        |       |
|------------------------------|------------------------------------------------------------------------------------|--------------------------------------|-------|
| Carbon Source                | Glucose                                                                            | 15                                   |       |
| Amino Acids                  | L-Arginine                                                                         | 0.72                                 |       |
|                              | L-Asparagine                                                                       | 0.5                                  |       |
|                              | L-Histidine                                                                        | 0.17                                 |       |
|                              | L-Isoleucine                                                                       | 0.24                                 |       |
|                              | L-Leucine                                                                          | 1                                    |       |
|                              | L-Methionine                                                                       | 0.125                                |       |
|                              | L-Valine                                                                           | 0.7                                  |       |
|                              | Vitamins                                                                           | Niacin                               | 0.01  |
| Biotin                       |                                                                                    | 0.004                                |       |
| Pantothenate                 |                                                                                    | 0.01                                 |       |
| Lipoic acid                  |                                                                                    | 0.01                                 |       |
| Folic acid                   |                                                                                    | 0.004                                |       |
| p-Aminobenzoic acid          |                                                                                    | 0.01                                 |       |
| Vitamin B1                   |                                                                                    | 0.01                                 |       |
| Vitamin B2                   |                                                                                    | 0.01                                 |       |
| Vitamin B6                   |                                                                                    | 0.01                                 |       |
| Vitamin B12                  |                                                                                    | 0.01                                 |       |
| Inorganic Salts              |                                                                                    | FeSO <sub>4</sub> ·7H <sub>2</sub> O | 0.005 |
|                              | K <sub>2</sub> HPO <sub>4</sub>                                                    | 6.48                                 |       |
|                              | KH <sub>2</sub> PO <sub>4</sub>                                                    | 3.12                                 |       |
|                              | MgCl <sub>2</sub>                                                                  | 0.3864                               |       |
|                              | NaCl                                                                               | 3                                    |       |
|                              | ZnSO <sub>4</sub>                                                                  | 0.005                                |       |
|                              | K <sub>2</sub> SO <sub>4</sub>                                                     | 0.023                                |       |
|                              | Boric acid                                                                         | 0.00075                              |       |
|                              | CaCl <sub>2</sub>                                                                  | 0.03                                 |       |
|                              | CoCl <sub>2</sub> ·6H <sub>2</sub> O                                               | 0.00019                              |       |
|                              | CuSO <sub>4</sub>                                                                  | 0.00012                              |       |
|                              | KI                                                                                 | 0.00011                              |       |
|                              | MnSO <sub>4</sub> ·H <sub>2</sub> O                                                | 0.00034                              |       |
|                              | (NH <sub>4</sub> ) <sub>6</sub> Mo <sub>7</sub> O <sub>24</sub> ·4H <sub>2</sub> O | 0.00019                              |       |
|                              | Other                                                                              | L-Glutathione reduced                | 0.015 |
|                              |                                                                                    | Ammonium citrate dibasic             | 1.69  |
| Citric acid·H <sub>2</sub> O |                                                                                    | 0.003                                |       |

79

80



81 **Table S2 The component of normal diet, antibiotics and yeast culture supplement.**

| Component                     | FN    | FA    | FYC   |
|-------------------------------|-------|-------|-------|
| Corn                          | 221.7 | 220.0 | 221.7 |
| Whey Powder                   | 150.0 | 150.0 | 150.0 |
| Flour                         | 90.0  | 90.0  | 90.0  |
| Extruded soybean              | 100.0 | 100.0 | 100.0 |
| Fermented soybean meal        | 50.0  | 50.0  | 45.0  |
| Fish meal                     | 40.0  | 40.0  | 40.0  |
| Glucose                       | 50.0  | 50.0  | 50.0  |
| Soybean protein concentrate   | 80.0  | 80.0  | 80.0  |
| Soybean oil                   | 30.0  | 30.0  | 30.0  |
| Calcium hydrophosphate        | 6.0   | 6.0   | 6.0   |
| L-Lysine Sulphate (70%)       | 9.0   | 9.0   | 9.0   |
| Zinc Oxide                    | 2.1   | 2.1   | 2.1   |
| Sodium chloride               | 3.0   | 3.0   | 3.0   |
| Organic acid                  | 3.0   | 3.0   | 3.0   |
| L-Threonine (99%)             | 2.0   | 2.0   | 2.0   |
| DL-Methionine (99%)           | 1.5   | 1.5   | 1.5   |
| L-tryptophan (99%)            | 0.5   | 0.5   | 0.5   |
| Choline chloride              | 0.5   | 0.5   | 0.5   |
| Mildew preventive             | 0.5   | 0.5   | 0.5   |
| Antioxidant                   | 0.2   | 0.2   | 0.2   |
| 1% Premix (S811)              | 10.0  | 10.0  | 10.0  |
| Second head                   | 150.0 | 150.0 | 150.0 |
| Enramycin (8%)                | -     | 0.1   | -     |
| Quinocetone (50%)             | -     | 0.1   | -     |
| Oxytetracycline calcium (20%) | -     | 1.5   | -     |
| Yeast culture                 | -     | -     | 5.0   |

82

83 **Table S3 Information of primer pairs designed for qPCR.**

| <b>Primers</b> | <b>Sequence (5'-3')</b> |
|----------------|-------------------------|
| P13-epsH1-F    | ATTACTCATCAGTCCCATACGCC |
| P13-epsH1-R    | GAATGGCAAAGTGAGGACCAATC |
| P13-epsJ1-F    | GGTTTAGGGTGCTAAATCGTGC  |
| P13-epsJ1-R    | AGCTTGTGGTTTTAAGGGCA    |
| P13-epsL-F     | CGAAACATTGGCCGCATAGTAG  |
| P13-epsL-R     | GTGAAGGTCTTGGGTTAGGAGG  |
| P13-epsD-F     | GTGAAGGTCTTGGGTTAGGAGG  |
| P13-epsD-R     | TTCGATGAGGATGAGCCATAGC  |
| P13-secA2-F    | CACTCATAGACTGGCTGCAATTG |
| P13-secA2-R    | GGGGGCGATTGTCTTAAATCAAG |
| P13-gtf1-1-F   | CCTGAACCCACTGCTTCCAT    |
| P13-gtf1-1-R   | TATTTACGGCGAGGGTGGTG    |
| P13-luxS-F     | GATCACACAAAGGTTAAGGCACC |
| P13-luxS-R     | GAACAATCAATCACGCCATCCAA |

84
